# Supplementary material for: CA-30, an oligosaccharide fraction derived from Liuwei Dihuang decoction, ameliorates cognitive deterioration via the intestinal microbiome in the senescence-accelerated mouse prone 8 strain
Source: publisher site journal article supplement (doi:10.18632/aging.101990), 2019-06-03
Supplement: Supplementary file [file aging-v11i11-101990-supplementary-material-SD1.pdf]

**SUPPLEMENTARY FIGURES**

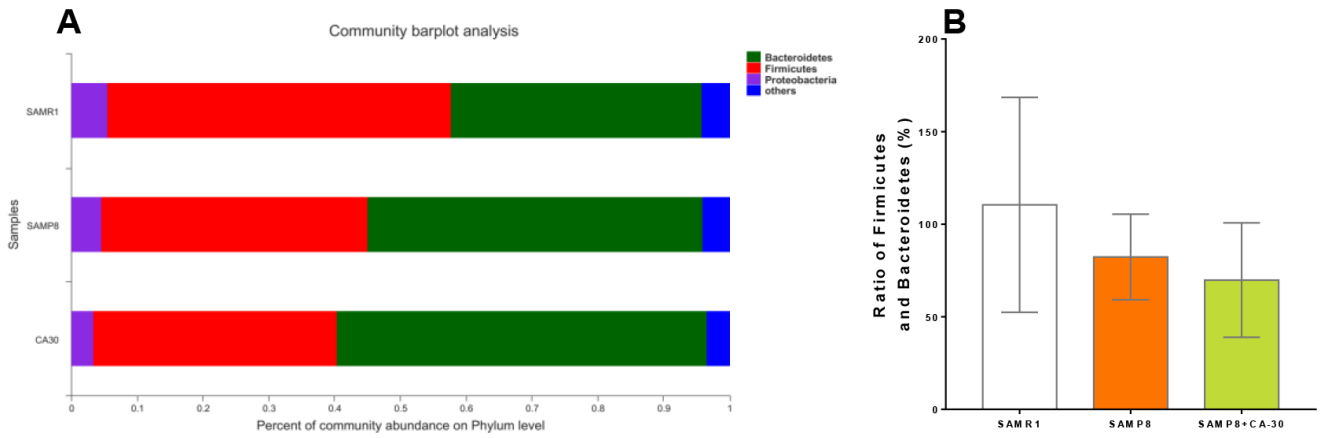

**Supplementary Figure 1.** Dominant bacteria taxa at the Phylum (A) level and abundant ratio of Firmicutes and Bacteroidetes (B) from all samples.

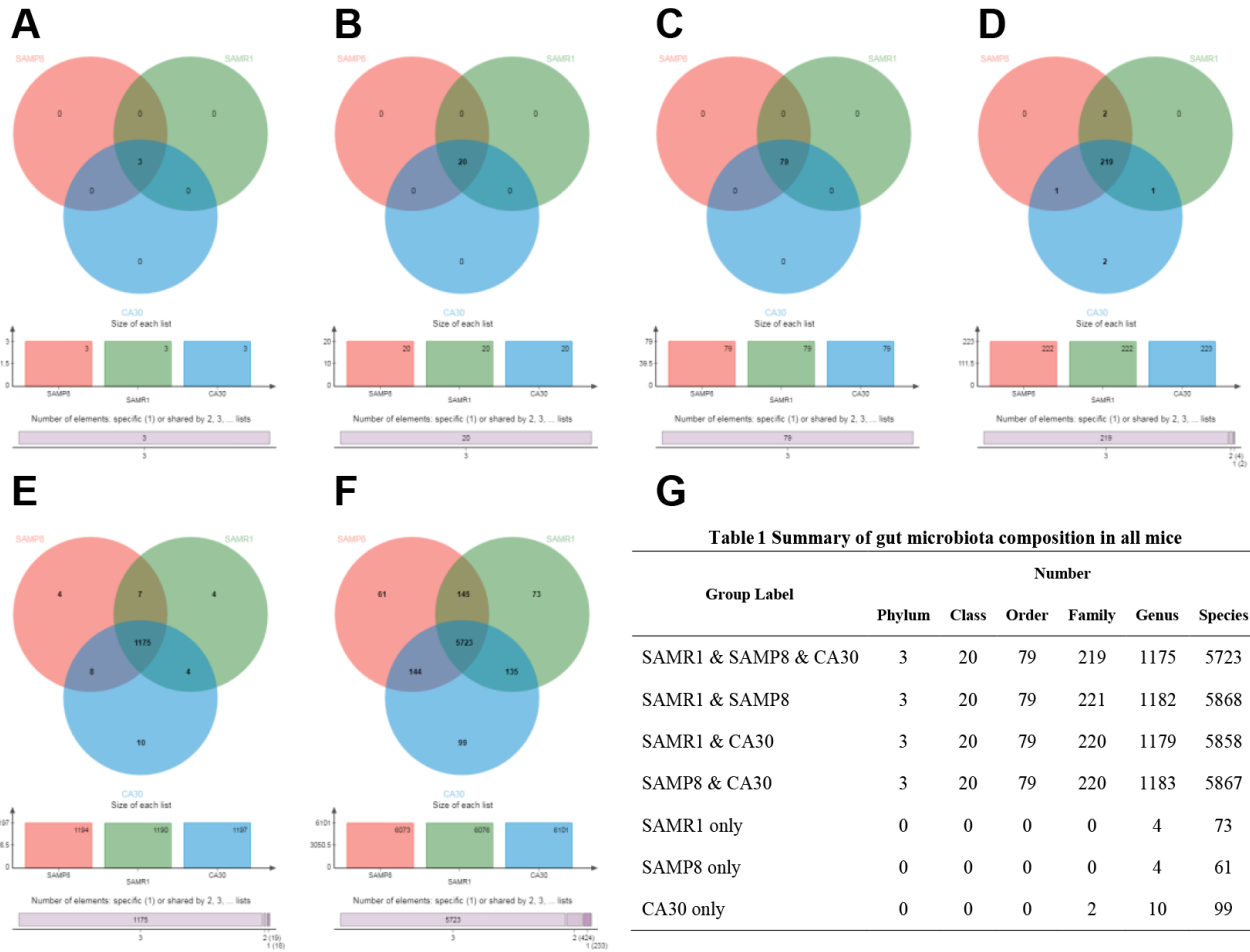

**Supplementary Figure 2.** Venn diagram of bacteria taxa at the Phylum (A), Class (B), Order (C), Family (D), Genus (E) and Species (F) level from all samples, and the summary of gut microbiota composition in all mice.

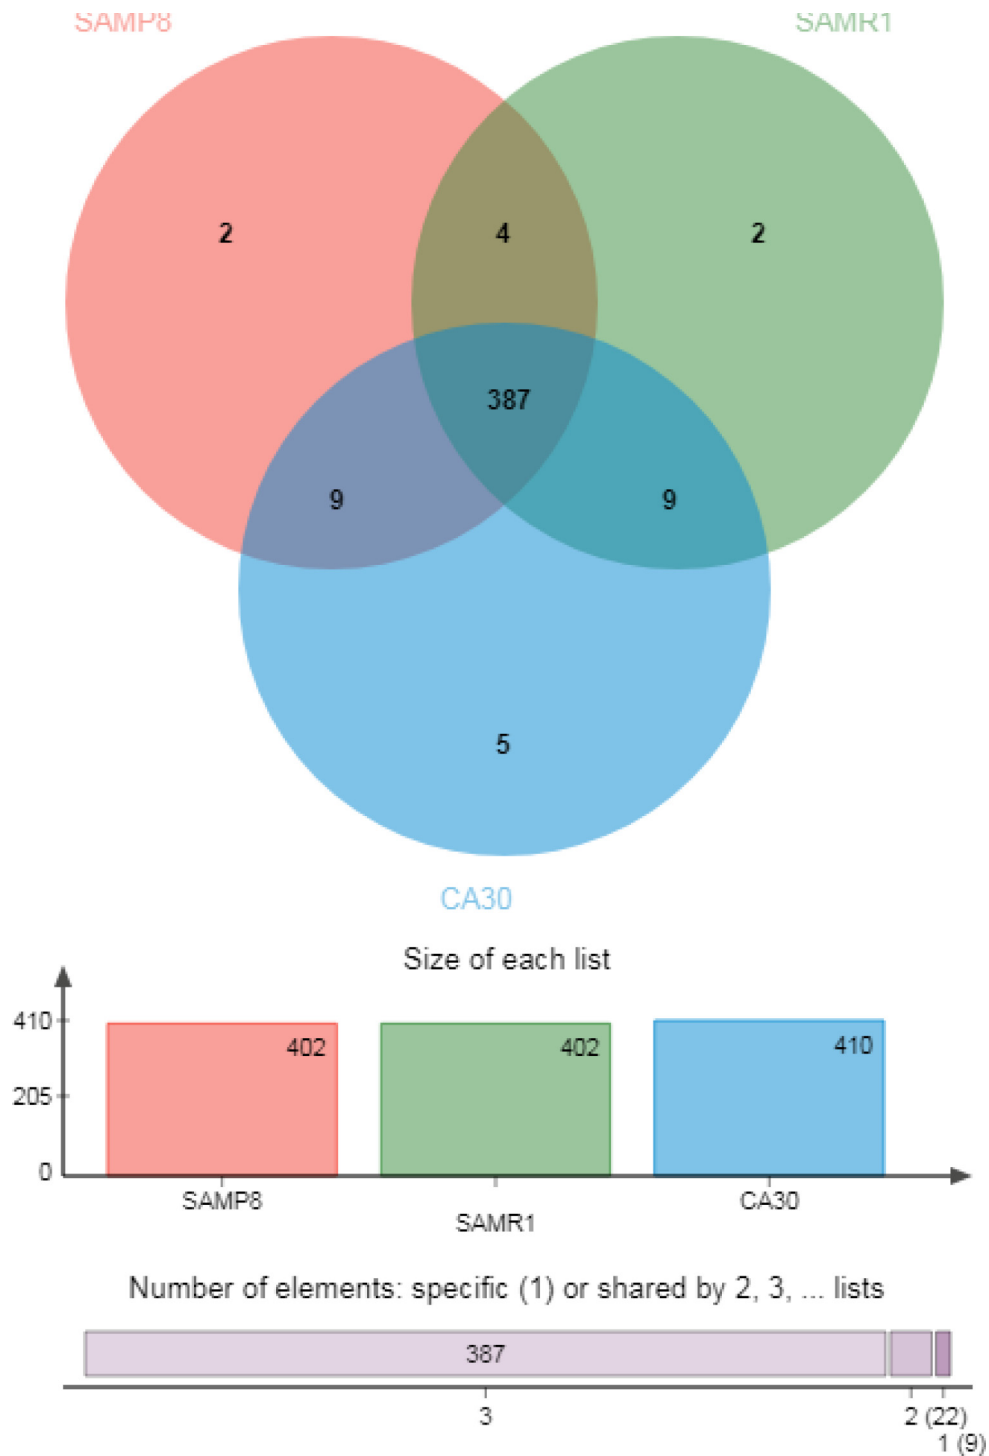

**Supplementary Figure 3. Venn diagram of microbial carbohydrate-active enzymes in all mice.** A total of 402, 402, and 410 non-redundant microbial carbohydrate-active enzymes were assigned for metaproteomes of SAMR1, SAMP8, and CA-30 group, respectively.
